# Supplementary material
Source: Springer Nature journal article supplement (https://www.springermedizin.de/resource/supplementary/12936_2009_956_MOESM4_ESM.pdf/9548624)

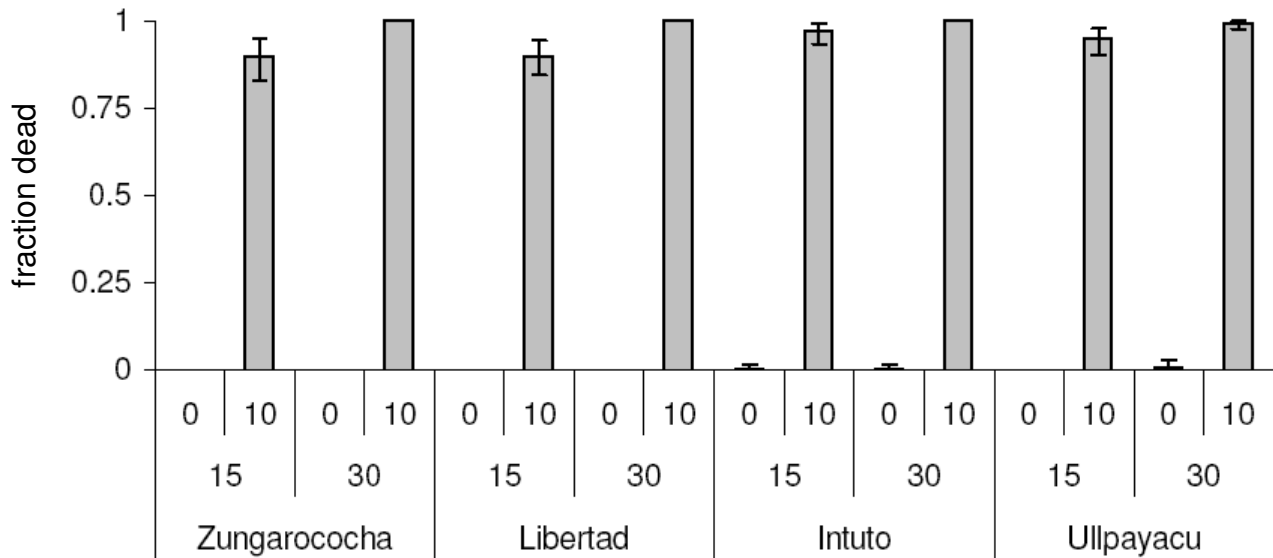

dose (ug / bottle), exposure time (minutes) and study site

Supplement: MOESM4 [file 9548624]
